# Supplementary material
Source: PubMed Central journal article supplement (PMC3497783)
Supplement: 1018858109_pnas.201018858SI.pdf [file 1018858109_pnas.201018858SI.pdf]

# Supporting Information

Bailey et al. 10.1073/pnas.1018858109

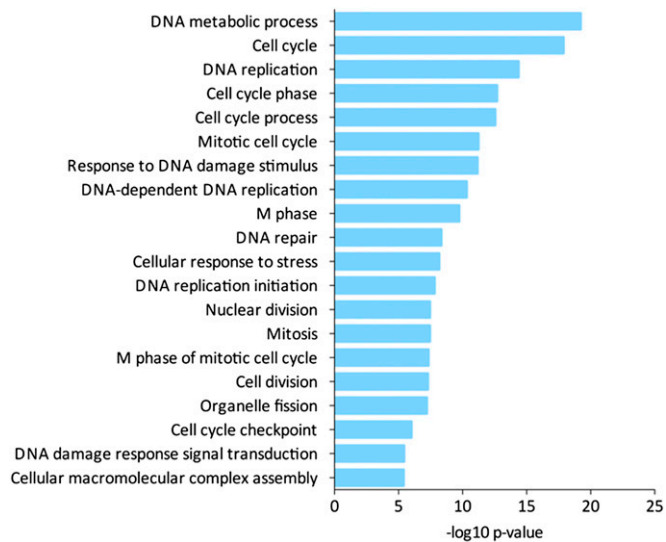

Fig. S1. Biological process GO terms of the 179 common genes.

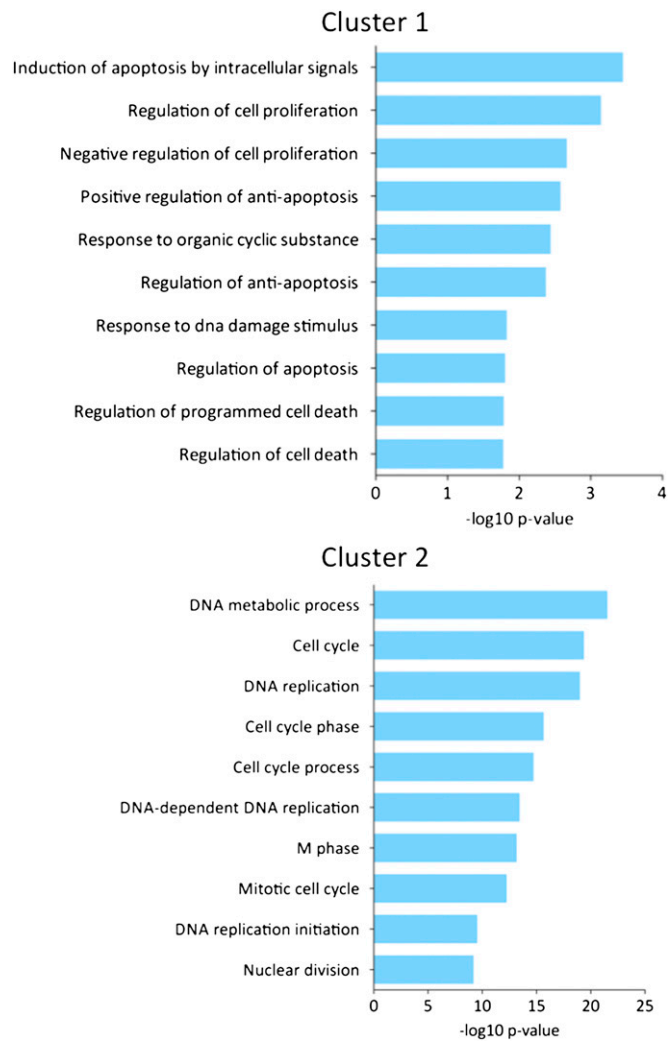

Fig. S2. Biological process GO terms of clusters 1 and 2.
